# Supplementary material for: Atypical cartilaginous tumor imaging findings in the distal phalanx of the left thumb: case report and literature review
Source: Front Oncol. 2025 Feb 24;15:1407012. doi: 10.3389/fonc.2025.1407012 (PMC11891022; doi:10.3389/fonc.2025.1407012)
Supplement: Supplementary Table 1 — List of primary atypical cartilaginous tumor or chondrosarcoma cases receiving imaging examination. LF, left foot; RH, right hand; PP, proximal phalanx; PIP, proximal interphalangeal point; LH, left hand; MP, metacarpophalangeal; Gd, gadolinium-enhanced; MC, metacarpal. [file Table1.xls]

## Sheet: Sheet1
Study	Number of cases	nation	Sex	age	size (cm)	Tumor Location	Symptoms	Imaging features				Histological grading（Histologic features）	follow-up (recurrence or metastasis)	Treatment
								Radiographic	CT	MRI	Bone scan
Lewis MM. 1975[6]	1	New York	female	71	2 × 3 × 1.5	the interphalangeal joint of the great toe (LF)	swelling, minimal pain (10 years)	a mass with irregular areas of calcification	none	none	none	not provided	18 months (none)	not treatment
Hernàndez-Vaquero D. 1991[7]	2	Spain	male	47	not provided	PP of the index finger (RH)	slow and progressive growth and local pain	an osseous lesion, superficial implantation, extraosseous chondroid calcifications, and broken cortex	none	none	none	grade II	six months (none)	amputation
			female	67	not provided	the fifth metacarpal (RH)	a tumor to grow as time passed	an osseous lesion with badly defined edges and central implantation, broken cortex and chondroid calcification	none	none	none	grade I	eight months (none)	disarticulation
Zhou LB. 2022[8]	1	China	male	74	5.49 × 4.46	1st phalanx (LF)	swelling ( six months), pain (two months)	none	osteolytic destruction, a local soft tissue density mass with speckled bony hyperdense shadow	a low-signal shadow of the mass enhances heterogeneously	none	not provided	30 months (none)	amputation
Jones HB. 2020[9]	1	USA	male	32	multifocal, 2.2 × 1.1 × 4.1 (maximum)	5th PIP digit, the wrist, the hook of the hamate, the 5th metacarpal (LH)	increasing pain and swelling	abnormality	none	cortical thinning and scalloping in the distal half of the fifth middle phalanx. T2 hyperintensity and T1 hypointensity	none	low-grade	28 months (none)	amputation + ray resection
Vasilakaki T. 2012[10]	1	Greek	female	76	4.5 × 2.6	4th PP (LH)	pain and swelling (several months)	relatively well marginated, the tumor destroys the cortex and extends into soft tissue	none	none	none	grade 2	two years (none)	curettage
Hamada K. 2010[11]	1	Japan	male	48	8 × 7 × 6	2nd metacarpal bone (RH)	pain (1 year)	osteolytic change, expansion of the shaft, thickening cortex	none	none	none	not provided	2 year, death (pulmonary metastases)	ray amputation
Miyake A. 2006[12]	1	Japan	female	53	not provided	MP joint of thumb (RH)	pain	osteolytic change, cortical destruction	destruction of the bone cortex, invasion of soft tissue	T1: an iso to low intensity, T2: a high intensity, Gd-enhanced: a lesion of irregular intensity with well-enhanced area, an osseous lesion, and invasion	abnormal accumulation of radioactivity	grade I–II	37 months (none)	resection + graft
Hatori M. 2006[13]	1	Japan	male	80	not provided	4th PP (RH)	swelling and pain (seven years)	a lesion with punctate calcification and irregular thickening of the cortex	a lesion with irregular thickening of the cortex and punctate calcification	T1: an extraskeletal lesion with iso signal intensities; T2: high intensities: Gd-enhanced: enhancement at the peripheral area	none	grade 2	2 year, death (pulmonary metastases)	amputation
Ollero P. 2021[14]	1	Belgium	male	46	not provided	MP joint of thumb (LH)	painless, the deformation and a slight loss of motion	punctate calcifications, cortical destruction, bone expansion and a large soft-tissue extension	none	none	none	grade 2	many years (none)	resection
Knapp P. 2019[15]	1	USA	male	36	3.8 × 2.2 × 3.5	3rd PP（RH）	a painful mass (several years)	a lytic lesion with surrounding periosteal reaction	none	T1: an expansile destructive mass; T2: high intensities	none	grade 2	1 years (none)	resection + amputation + ray resection
Özmanevra R 2019[16]	1	Cyprus	female	52	not provided	PP of the great toe (LF)	swelling	endosteal scalloping, cortical destruction	none	soft-tissue invasion, cortical destruction	none	grade 2	1 years (none)	resection or amputation.
García-Jiménez A. 2019[17]	2	Spain	female	85	not provided	1st MC (RH)	swelling	periosteal reaction, cortical destruction	none	none	none	grade II/III	3 months (recurrence)	ray amputation
		Spain	female	85	not provided	4th PP (RH)	swelling	osteolytic change, periosteal reaction	cortical destruction	cortical destruction, soft tissue invasion	none	grade I/III	3 months (no treatment)	curettage + graft
Pop DL. 2017[18]	1	Romania	male	60	not provided	4th and 5th fingers （RH）	swelling, paresthesia and partial functional impairment	an extensive tumoral mass with the invasion	none	T1 hyposignal ; T2 hypersignal, irregular multi-lobular shape, lytic lesion with periosteal reaction, cortical destruction	none	grade 1	1 years (none)	resection + curettage
Hills AJ. 2014[19]	1	uk	female	30	1.5 × 1.2 × 1.0	5th MC (RH)	a painful swelling	an expanding lytic lesion with diffuse borders and punctate calcication	none	thinning and erosion of the cortex, with a small degree of signal change extending into the soft tissues	none	grade 2	9 years (none)	resection
de Moraes FB. 2014[20]	1	Brazil	female	30	not provided	calcaneal (RF)	a painless mass (8 years)	a tumor with imprecise limits, a destructive, aggressive and osteolytic appearance, with invasion of the soft tissues and calcication	none	none	none	not provided	six months (recurrence), 2 years (multiple metastasis, death)	amputation
Mondal SK. 2012[21]	1	India	male	37	3.5 × 3	the distal phalanx of the great toe (RF)	swelling and pain (2 years)	a lytic lesion with soft tissue extension	none	none	none	grade 1	1 years (none)	amputation
Decomas A. 2011[22]	1	USA	male	56	not provided	4th metatarsal (LF)	pain	moth-eaten' cortical destruction, endosteal scalloping, proable soft-tissue	cortocal destruction, soft-tissue mass, calcication	cortocal destruction, marrow replacement, and a soft-tissue mass with a cartilaginous matrix	none	low-grade	41/2 years (none)	ray resection
Tos P. 2009[23]	1	Italy	female	50	not provided	the index distal phalanx (LH)	enlargement and nail plate deformity (20 years), pain ( only a short time)	a wide osteolytic area	none	STIR: a rounded high-intensity image; sagittal T1: a low-intensity non homogeneous lesion	none	grade II	5 years (none)	amputation
Toriyama K. 2009[24]	1	Japan	female	71	not provided	1st metatarsal (LF)	a mass (3 month)	none	none	a tumour with soft-tissue extension	none	unknown	2 years (none)	resection + reconstruction
Hatori M. 2007[25]	1	Japan	female	62	not provided	the distal phalanx of the great toe （LF）	pain and swelling	a lesion with subtle punctate calcification and cortical irregularity	a lesion with subtle punctate calcification and cortical irregularity	a multilobular lesion; T1: isosignal intensities; T2: high signal intensities; gadolinium injection: enhancement	none	grade 1	2 years (none)	amputation
Mohammadianpanah M. 2004[26]	1	Persian	female	32	not provided	3rd PP (LF)	swelling and tenderness of the left middle toe	sclerotic changes with soft tissue swelling and cortical irregularities	erosion and sclerosis, soft tissue extension, calciﬁcation	none	none	grade 2	not provided	amputation
Masuda T. 2004[27]	1	Japan	female	32	not provided	2nd distal phalanx (RF)	pain, swelling, and nail deformity (6 months)	an expanding osteolytic lesion with calciﬁcation	a soft-tissue tumor with partial cortical disruption	T1: low intensity; T2: high intensity; enhancement.	abnormal accumulation of uptake	grade 2	2 years (none)	amputation
Gupta K. 2004[28]	1	India	male	12	not provided	calcanaeum	pain and mild swelling (15 days)	a dense irregular, ill-deﬁned lesion	none	none	none	unknown	not provided	amputation
Patil S. 2003[29]	23	UK	male: 10; female: 13	mean: 67 (range: 42–85)	1.2 - 7	small bones of the hand	pain (11), swelling (2), both (10)	matrix calciﬁcation and/or endosteal erosion in 22 cases, cortical destruction and/or bone expansion in 20 cases, soft-tissue mass and/or indistinct margins in 19 and joint extension and/or pathological fracture in 5 cases	none	none	none	grade 2 or more	20 alive and well, 3 death non-related cause	ray resection (7), curettage(4), amputation(8), curettage & graft (2), excision /curettage (1), excision biopsy (1）
Lo EP. 2000[30]	1	USA	male	64	not provided	5th metatarsa (RF)	swelling (7-8 years )	increased soft-tissue density and volume in the area of the mass, erosive changes with calcified stippling	an associated soft tissue mass	none	none	unknown	not provided	amputation
Ralph BG. 1999[31]	1	USA	male	87	5 × 4.5	2nd PP (LF)	a painless, large mass	a bony abnormality, cortical destruction, soft-tissue invasion	none	none	none	grade 1	18 months (none)	resection
Hottya GA. 1999[32]	2	USA	male	69	not provided	the cuboid (RF)	a painful growing mass(3 years)	nonuniform osteolysis with irregular trabeculation, thinning and expansion	none	T1: low signal intensity T2: diffuse, high signal intensity. CE-MRI: nonuniform mild enhancement	intense uptake	grade 1-2/3	1 year (none)	resection
			male	47	not provided	the calcaneus (RF)	pain (7 months)	subtle calcifications and large areas of ill-defined lucency	none	a lobulated, septated, expansile high signal intensity lesion containing low signal intensity calcification posteriorly, cortical breakthrough into the soft tissues	none	grade 1/3	2 years (none)	amputation
Bovée JV. 1999[33]	35	The Netherlands	14 vs. 21 （male vs. female）	media 67 (range 21– 87)	not provided	the Phalanx (hand and foot)	not provided	most often as an osteolytic, lobulated tumor with intralesional calciﬁcations and ill-deﬁned margins with cortical destruction and soft-tissue extension.	none	none	none	grade 1，2，3	10 recuurence, 25 alive and well	curettage or local excision (16) , amputation or exarticulation (19)
Nakajima H. 1988[34]	1	Japan	male	36	not provided	the distal, middle, and proximal phalanges of the second toe (RF)	tenderness and deformity of the foot	a partially calcified, destructive, and expanding lesion, a slightly expansile lesion, cortical destruction. angiogram: a vascularized mass	none	none	an abnormal accumulation of radioactivity	grade 1	26 months (none)	amputation
Wiss DA. 1983[35]	1	USA	male	84	2 × 2	the first metatarsal (LF)	pain and swelling (8 weeks)	destruction with an enlarging soft tissue mass	none	none	none	grade II	1 year and 10 month (pulmonary metastasis, death)	amputation
Wirbel RJ. 1999[36]	1	Germany	male	29	not provided	the first metacarpal bone (RH)	pain	an intraosseous lytic lesion with a dorsoradial fissure	none	none	none	low-grade	26 months (none)	curettage and bone grafting
Jakobson. E. 1960[37]	2	Sweden	female	52	not provided	the middle phalanx of the index finger (LH)	swelling	an expansion with destruction of the cortex	none	none	none	unknown	14 years (none)	amputation
			male	58	4	5th metacarpal (LH)	swelling	destruction of joint surface with calcification	none	none	none	unknown	over 3 years (none)	amputation
Hong W. 2022	1	China	female	82	2.7 × 2.3 × 2.3	the distal phalanx of the thumb (LH)	swelling	osteolytic destruction, destruction of the cortex, soft tissue mass	osteolytic destruction	destruction of the cortex, soft tissue mass. T1: iso-signal intensity; T2: heterogeneously high signal intensity	none	atypical cartilaginous tumor	Amputation	amputation
